# Supplementary material for: Study on the Regulation of Exogenous Hormones on the Absorption of Elements and the Accumulation of Secondary Metabolites in the Medicinal Plant Artemisia argyi Leaves
Source: MDPI journal article supplement (doi:10.3390/metabo12100984), 2022-10-17
Supplement: s1 [file s1]

Table S2 The linear relationship of 8 bioactive components

|                       | Regression equation | $R^2$  | Linear range ( $\mu\text{g}\cdot\text{L}^{-1}$ ) |
|-----------------------|---------------------|--------|--------------------------------------------------|
| Neochlorogenic acid   | $Y=25.673x-13.855$  | 0.9994 | 0.625~20.0                                       |
| Chlorogenic acid      | $Y=28.850x-14.752$  | 0.9996 | 0.631~20.2                                       |
| Isochlorogenic acid B | $Y=18.276x-18.041$  | 0.9993 | 5.000~30.0                                       |
| 7-hydroxycoumarin     | $Y=48.606x-22.503$  | 0.9995 | 0.619~19.8                                       |
| Isochlorogenic acid A | $Y=23.364x-14.643$  | 0.9996 | 0.631~20.2                                       |
| Isochlorogenic acid C | $Y=40.508x-27.437$  | 0.9993 | 0.619~19.8                                       |
| Jaceosidin            | $Y=38.460x-188.882$ | 0.9996 | 0.631~20.2                                       |
| Eupatilin             | $Y=53.694x-25.287$  | 0.9995 | 0.612~19.6                                       |
