# Supplementary material for: Study on the Regulation of Exogenous Hormones on the Absorption of Elements and the Accumulation of Secondary Metabolites in the Medicinal Plant Artemisia argyi Leaves
Source: MDPI journal article supplement (doi:10.3390/metabo12100984), 2022-10-17
Supplement: s1 [file s1]

Table S1 The linear relationship of 21 elements.

| Element | Regression equation         | $R^2$ |
|---------|-----------------------------|-------|
| B       | $Y=17780.591X+342674.821$   | 0.996 |
| Na      | $Y=82720.896X+8018782.106$  | 0.987 |
| Mg      | $Y=92384.176X+1581598.407$  | 0.991 |
| Al      | $Y=66405.145X+6890877.427$  | 0.999 |
| P       | $Y=5205.398X+809029.403$    | 0.991 |
| K       | $Y=84914.212X+6133610.229$  | 0.990 |
| Ca      | $Y=5497.665X+827975.725$    | 0.969 |
| Ti      | $Y=124488.712X+209415.748$  | 0.999 |
| V       | $Y=133712.848X+36221.520$   | 0.996 |
| Cr      | $Y=125034.490X+125467.126$  | 1.000 |
| Mn      | $Y=218205.035X+209991.832$  | 1.000 |
| Fe      | $Y=4403.239X+226236.594$    | 0.986 |
| Co      | $Y=150401.167X+11099.937$   | 1.000 |
| Ni      | $Y=30029.727X+26897.907$    | 1.000 |
| Cu      | $Y=71366.058X+104663.907$   | 1.000 |
| As      | $Y=16056.110X+4768.524$     | 0.999 |
| Se      | $Y=1208.536X+3483.118$      | 1.000 |
| Sr      | $Y=284365.300X+109939.198$  | 1.000 |
| Mo      | $Y=38054.183X+14542.157$    | 1.000 |
| Cd      | $Y=23041.150X+708.374$      | 1.000 |
| Sn      | $Y=83646.168X+6709.425$     | 1.000 |
| Ba      | $Y=46525.293X+102227.507$   | 0.997 |
| Pb      | $Y=203730.475X+1284501.449$ | 1.000 |
